# Supplementary material for: Theoretical study of electrocatalytic properties of low-dimensional freestanding PbTiO3 for hydrogen evolution reactions
Source: Royal Society of Chemistry journal article supplement (doi:10.1039/d3cp04241c), 2023-01-01
Supplement: d3cp04241c1.pdf [file d3cp04241c1.pdf]

Cite this: DOI: 00.0000/xxxxxxxxxx

## Supporting Information : Theoretical calculation of electrocatalysts properties of freestanding low dimensional PbTiO<sub>3</sub> for hydrogen evolution reactions

Tarik Ouahrani<sup>\*a,b</sup>, Reda M. Boufatah<sup>b</sup>, Loubna Bendaoudi<sup>c</sup>, Zeyneb Bedrane<sup>b</sup>, Ángel Morales-García<sup>d</sup> and Daniel Errandonea<sup>e</sup>

<sup>a</sup>École supérieure en sciences appliquées, ESSA-Tlemcen, BB 165 RP Bel Horizon, Tlemcen 13000, Algeria. <sup>c</sup>Laboratory of Materials Discovery, Unit of Research Materials and Renewable Energies, LEPM-URMER, Université de Tlemcen 13000 Algeria.

<sup>b</sup>Laboratoire de Physique Théorique, Université de Tlemcen 1300 Algeria; E-mails: tarik\_ouahrani@yahoo.fr <sup>d</sup>Departament de Ciència de Materials i Química Física & Institut de Química Teòrica i Computacional (IQTUB), Universitat de Barcelona, c/Martí i Franquès 1-11, 08028 Barcelona, Spain <sup>e</sup>Departamento de Física Aplicada - Instituto de Ciencia de Materiales, Matter at High Pressure (MALTA) Consolider Team, Universidad de Valencia, Edificio de Investigación, C/Dr. Moliner 50, Burjassot, 46100, Valencia, Spain

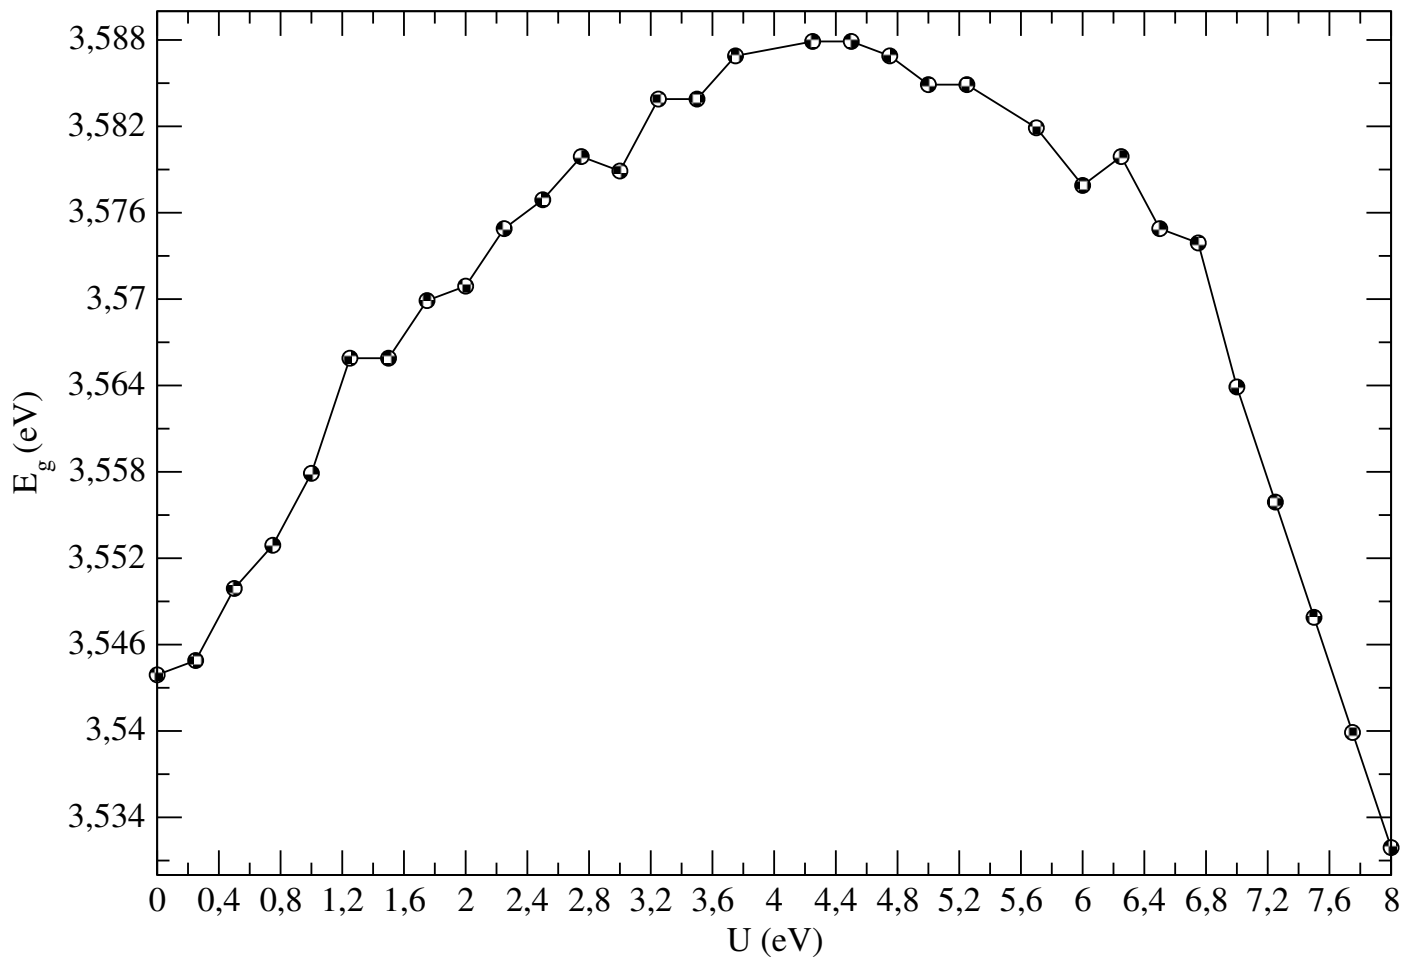

Fig. S1 (Color online) The optimization of Hubbard correction  $U$  as a function of band gap  $E_g$ . Here Hund's corrections  $J$  is taken constant at 2 eV

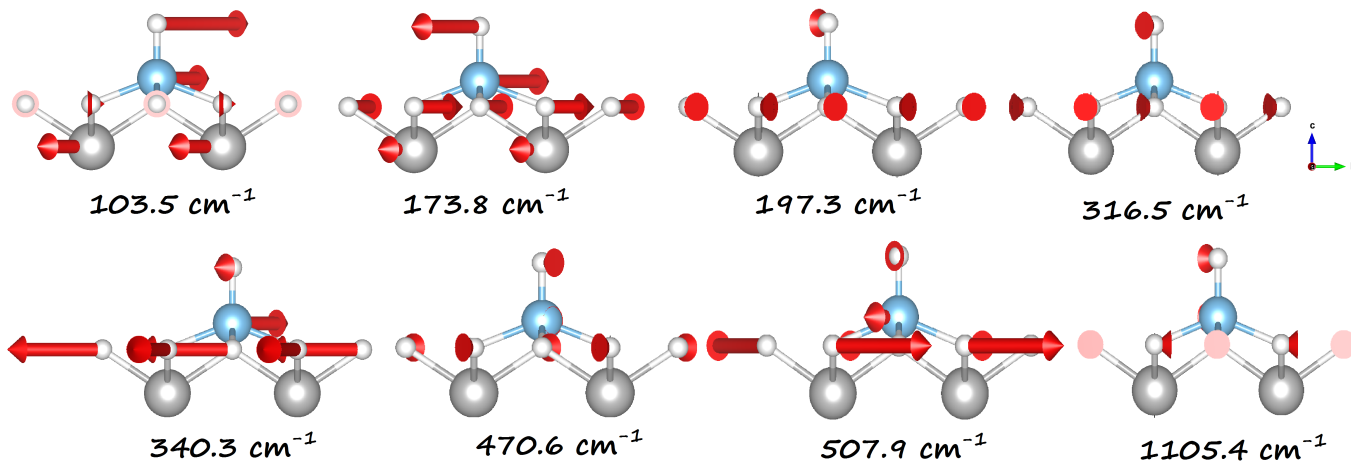

Fig. S2 (Color online) vibrational eigenvectors of the zone-centered acoustic phonon modes shown in the low dimensional  $\text{PbTiO}_3$  structure. The light blue, white, and gray balls represent Ti, O, and Pb atoms, respectively

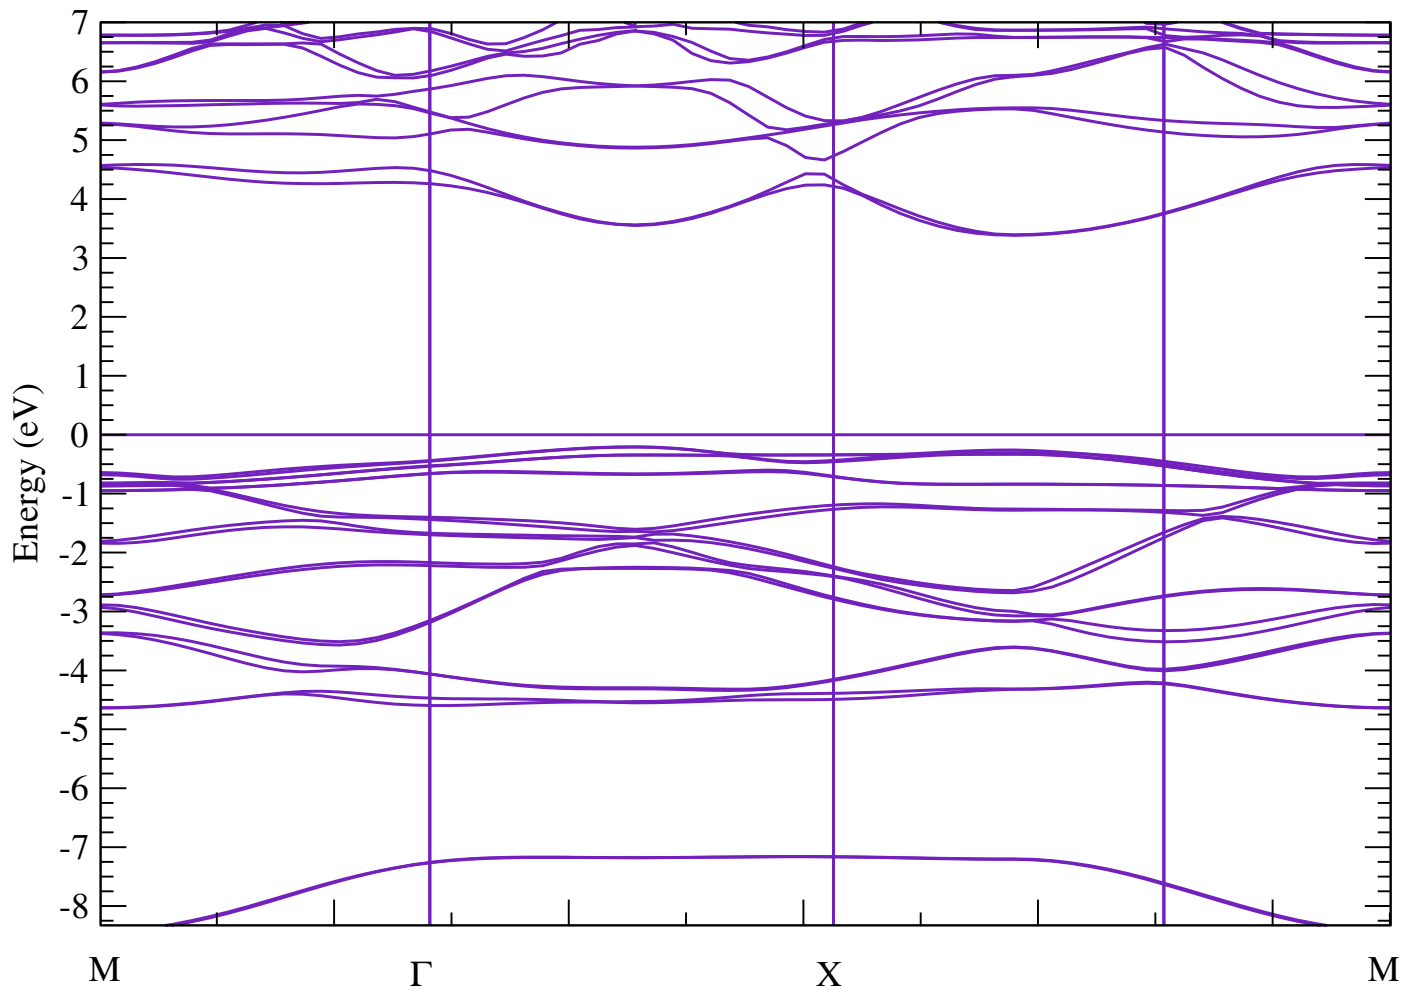

Fig. S3 (Color online) band structure plot for pristine low dimensional PbTiO<sub>3</sub> structure at DFT +  $U$  + SOC level

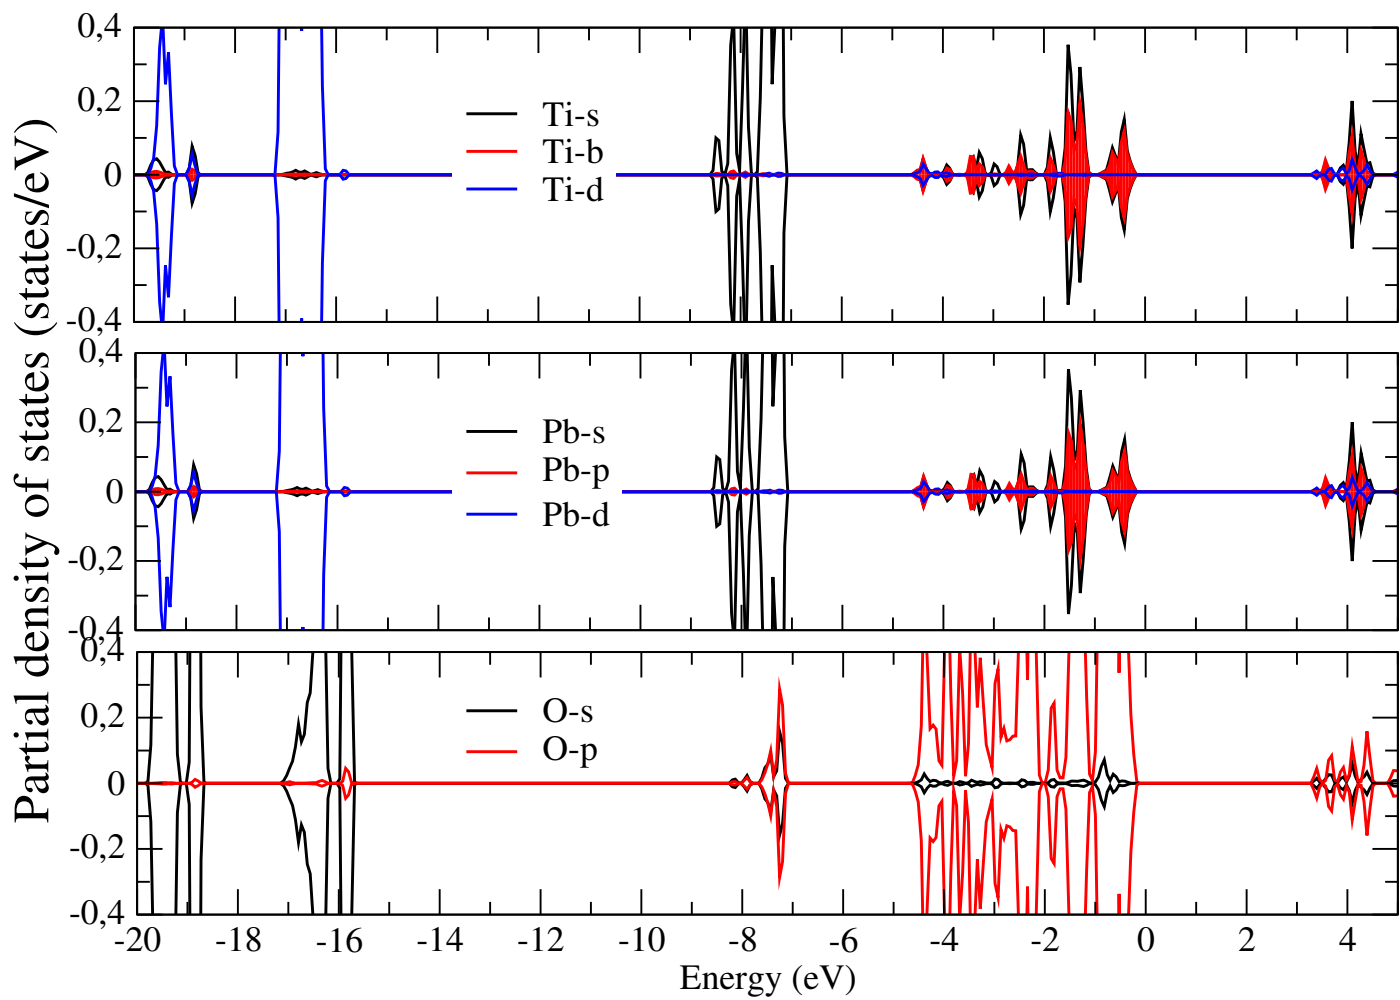

Fig. S4 (Color online) Projected densities of states (PDOS) of pristine low dimensional  $\text{PbTiO}_3$  structure DFT +  $U$  level.
